# Supplementary material for: Flexible and transparent free-standing films with enhanced magnetic and luminescent anisotropy
Source: Royal Society of Chemistry journal article supplement (doi:10.1039/c3ta01674a), 2013-01-01
Supplement: c3ta01674a.pdf [file c3ta01674a.pdf]

# Electronic Supplementary Material (ESI) for Journal of Materials Chemistry A

# This journal is © The Royal Society of Chemistry 2012

## Flexible and transparent free-standing films with enhanced magnetic and luminescent anisotropy

Yibo Dou, Xiaoxi Liu, Mingfei Shao, Jingbin Han,\* Min Wei

*State Key Laboratory of Chemical Resource Engineering, Beijing University of Chemical  
Technology, Beijing 100029, P. R. China*

### CORRESPONDING AUTHOR FOOTNOTE

\* Corresponding author. Phone: +86-10-64412131. Fax: +86-10-64425385. E-mail:  
[hanjb@mail.buct.edu.cn](mailto:hanjb@mail.buct.edu.cn).

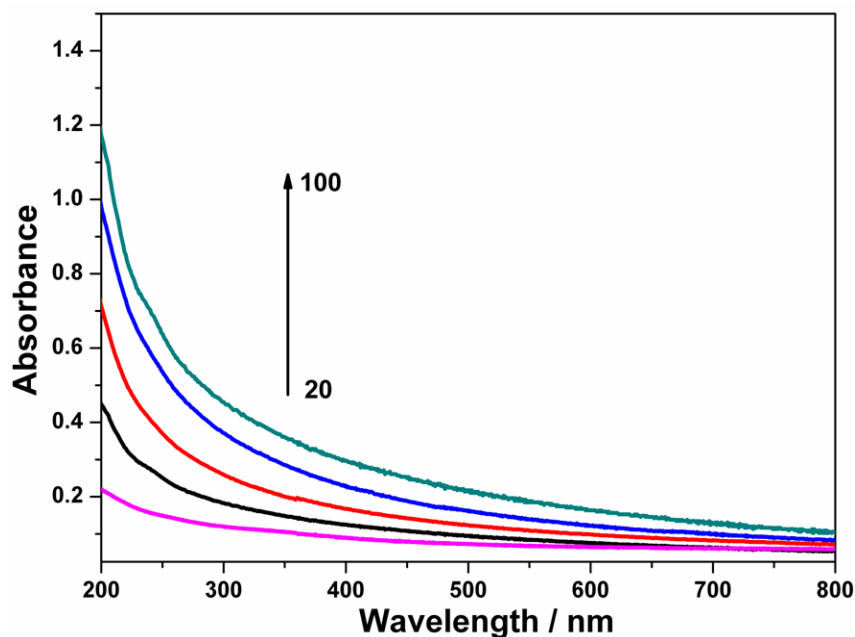

**Figure S1.** UV-vis spectra of the  $(\text{LDH/PVA})_n$  ( $n = 20, 40, 60, 80$  and  $100$ ) films.

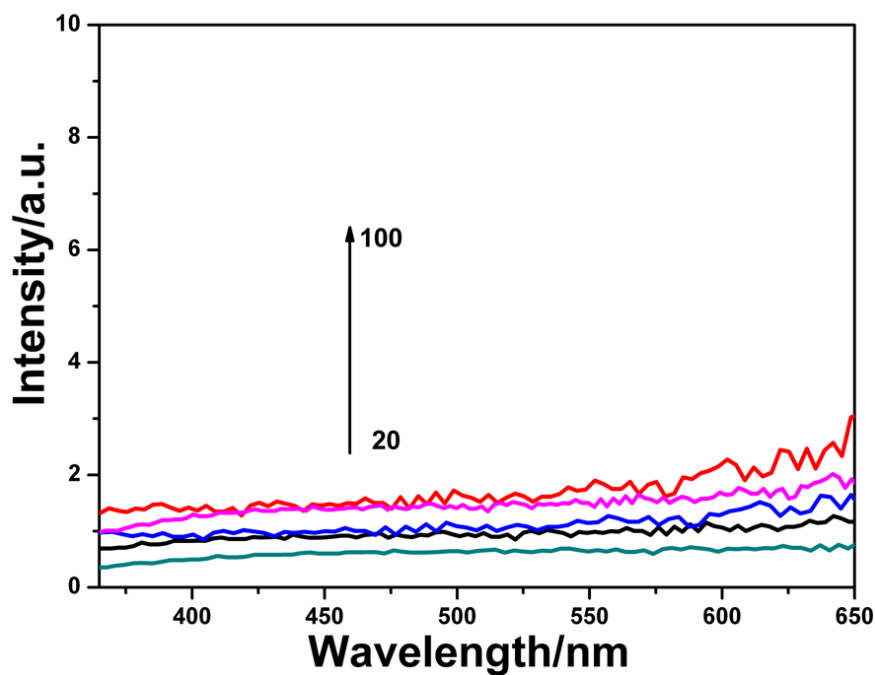

**Figure S2.** Fluorescence spectra of the  $(\text{LDH/PVA})_n$  ( $n = 20, 40, 60, 80$  and  $100$ ) films.

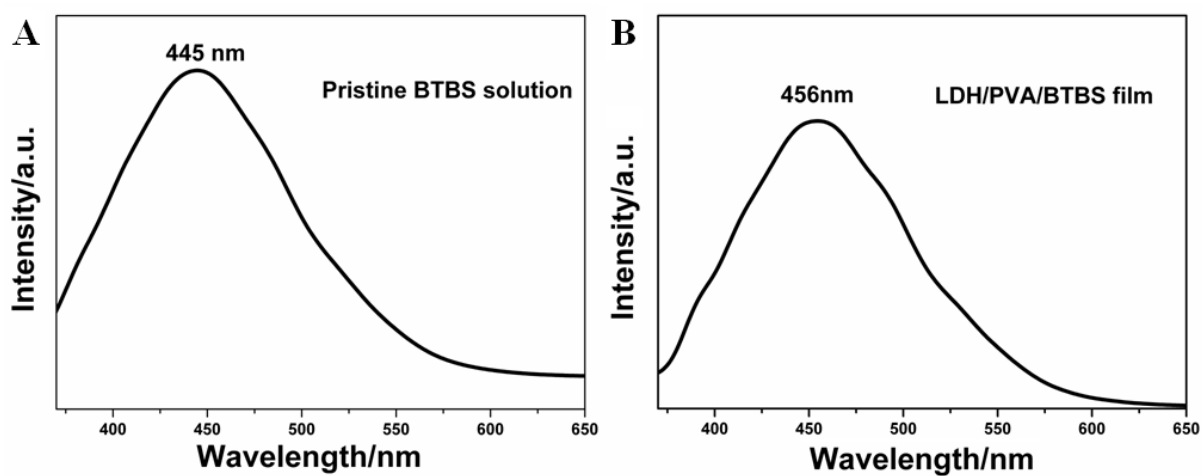

**Figure S3.** The fluorescence spectra of (A) pristine BTBS solution and (B) LDH/PVA/BTBS film prepared by solvent evaporation method.

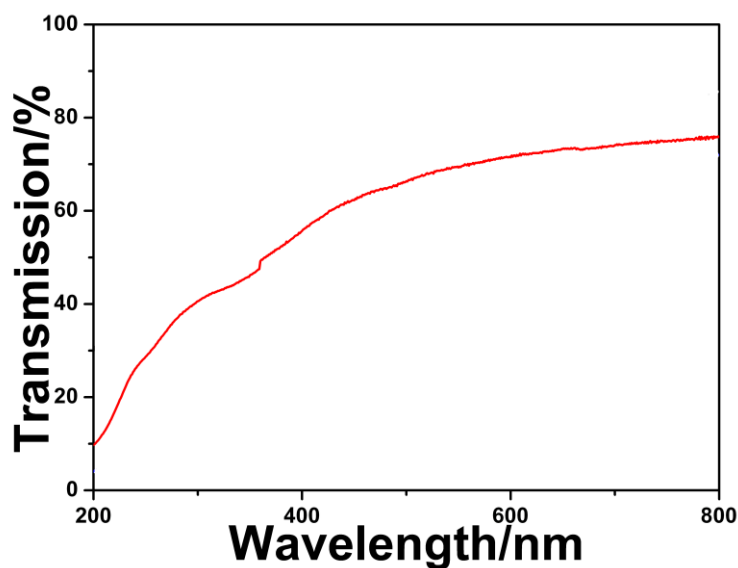

**Figure S4.** UV-vis transmittance spectrum of the (LDH/PVA/LDH/BTBS)<sub>300</sub> film.

**Table S1.** The compositions of (LDH/PVA/LDH/BTBS)<sub>300</sub> films obtained by using LDH suspensions with various concentrations (0.10 wt.%, 0.30 wt.% and 0.45 wt.%, respectively)

| Sample                                   | LDH (wt.%) | PVA (wt.%) | BTBS (wt.%) |
|------------------------------------------|------------|------------|-------------|
| b-(LDH/PVA/LDH/BTBS) <sub>300</sub> film | 5.30       | 92.75      | 1.95        |
| c-(LDH/PVA/LDH/BTBS) <sub>300</sub> film | 7.47       | 90.56      | 1.97        |
| d-(LDH/PVA/LDH/BTBS) <sub>300</sub> film | 10.14      | 87.82      | 2.04        |

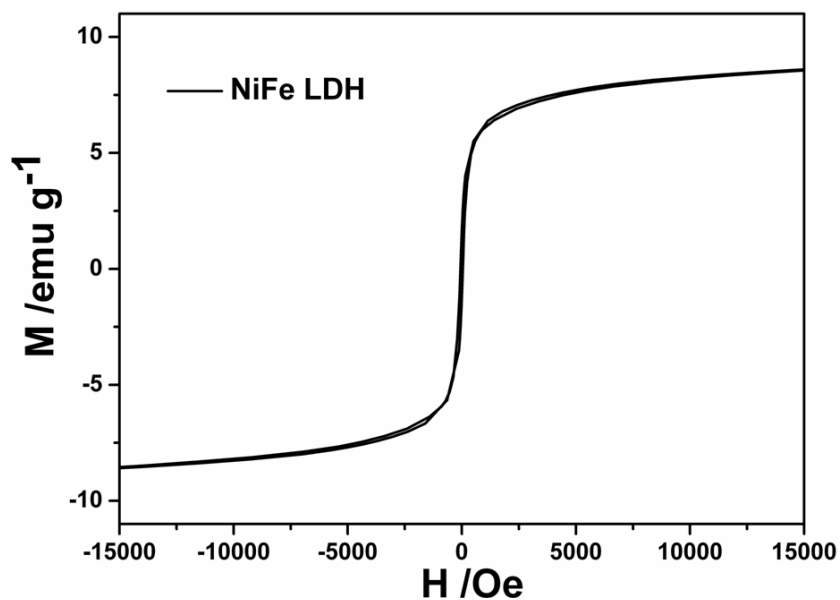

**Figure S5.** Room temperature (300 K) hysteresis loops for NiFe-LDH powder.

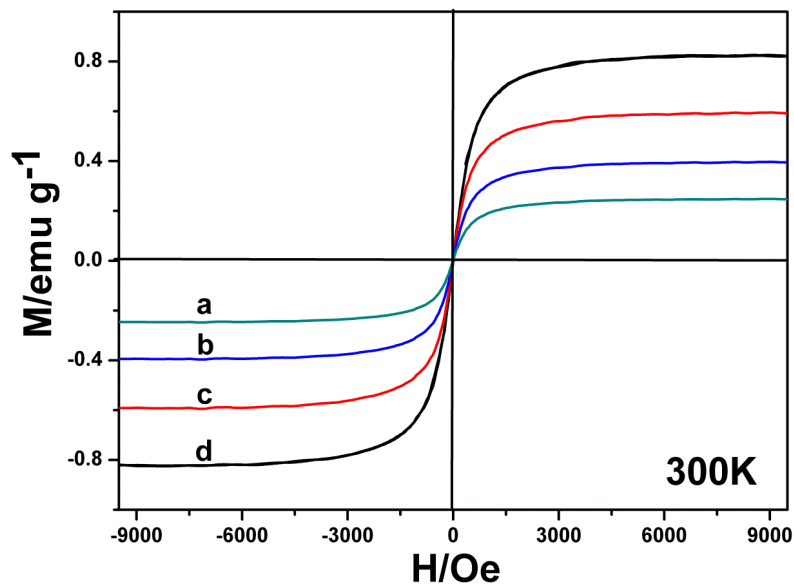

**Figure S6.** (A) Room temperature (300 K) hysteresis loops for (a) LDH/PVA/BTBS film with  $W_L=5.30\%$  and  $(\text{LDH/PVA/LDH/BTBS})_{300}$  films with various  $W_L$  values (b: 5.30%; c: 7.47% and d: 10.14%).

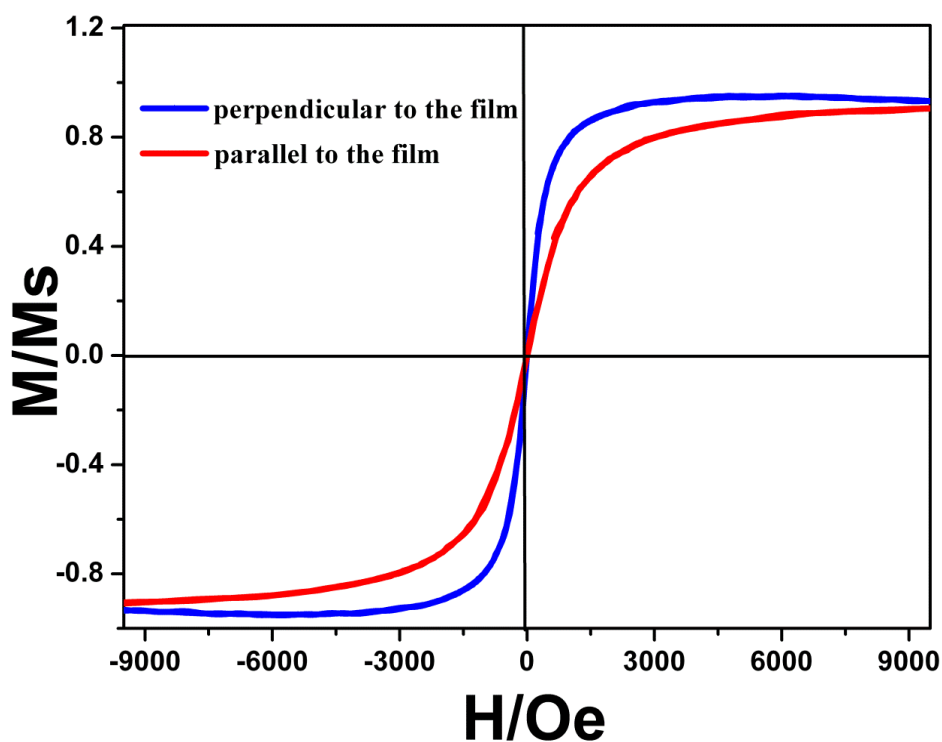

**Figure S7.** Room temperature (300 K) hysteresis loops at both orientations (magnetization values were normalized based on the corresponding saturation ones) for the  $(\text{LDH/PVA/LDH/BTBS})_{300}$  film.

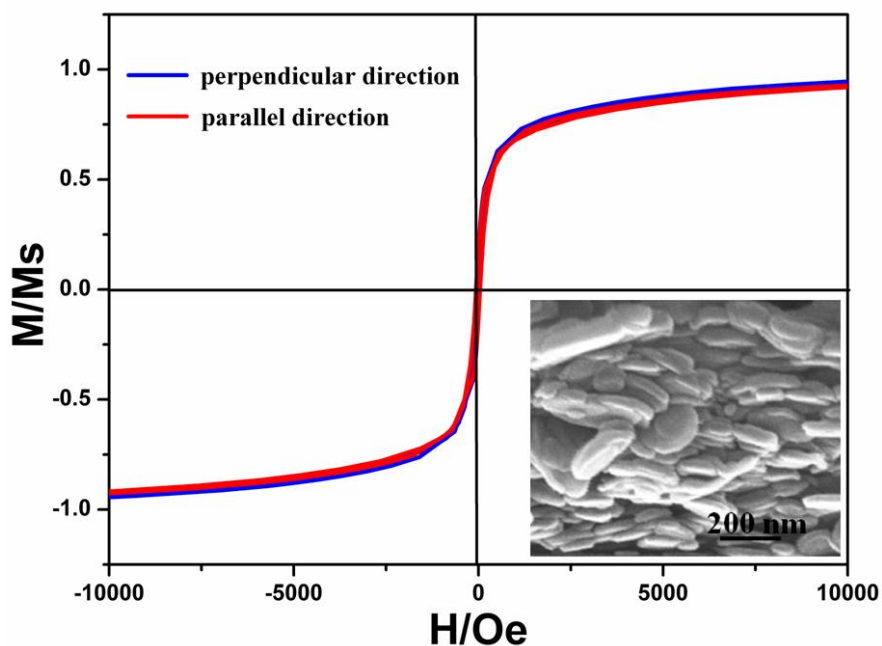

**Figure S8.** Room temperature (300 K) hysteresis loops at both orientations (magnetization values were normalized based on the corresponding saturation ones) for the disordered LDH tablet prepared by squash technique.

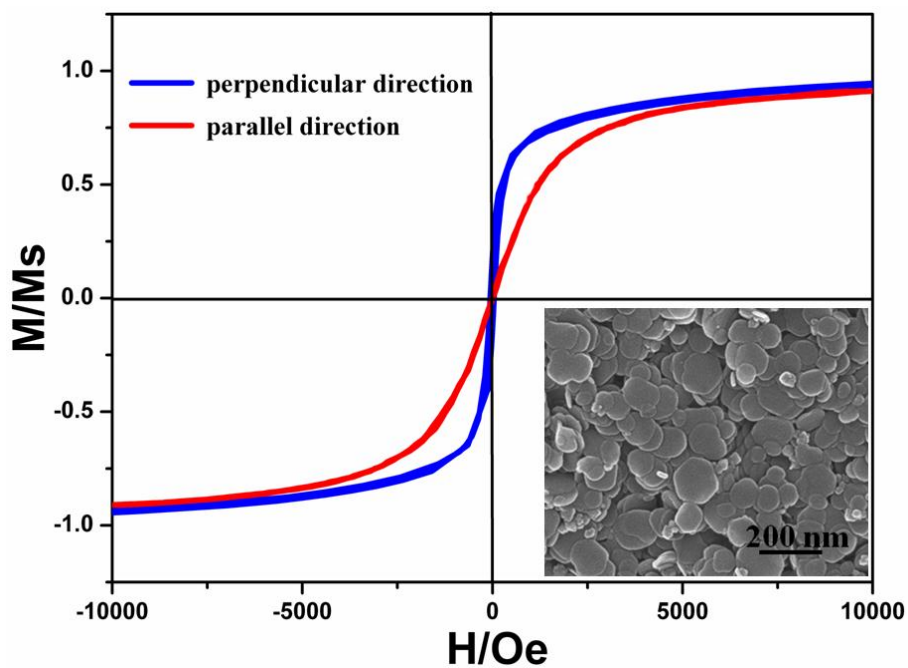

**Figure S9.** Room temperature (300 K) hysteresis loops at both orientations (magnetization values were normalized based on the corresponding saturation ones) for the oriented LDH film obtained by spin-coating technique.

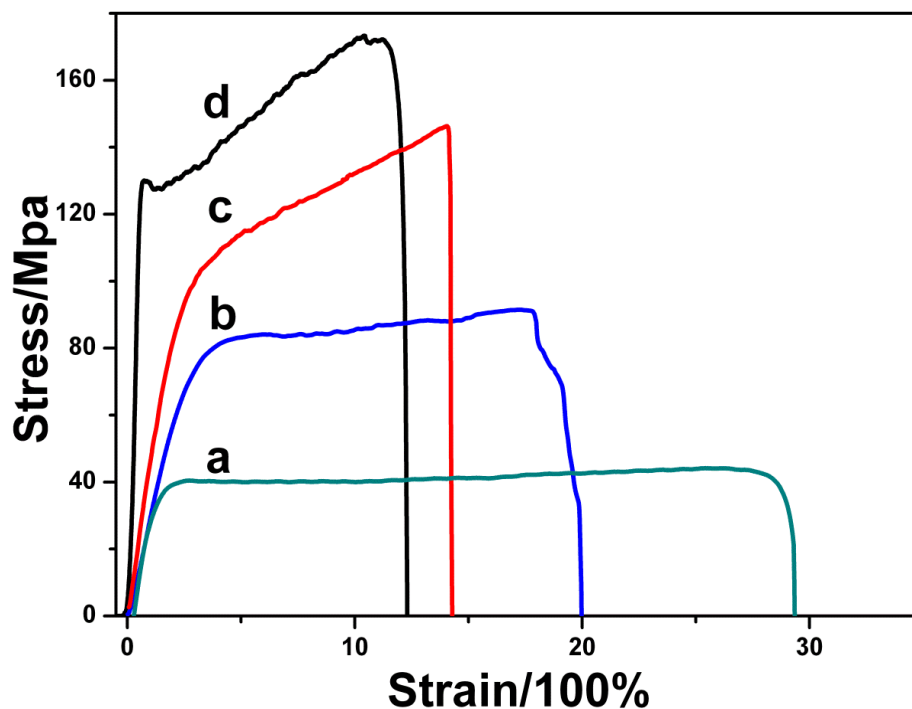

**Figure S10.** Stress–strain curves for (a) the disordered LDH/PVA/BTBS film with  $W_L=5.30\%$  and the ordered  $(\text{LDH/PVA/LDH/BTBS})_{300}$  films with various  $W_L$  (b: 5.30%; c: 7.47% and d: 10.14%).

Tensile strength tests were carried on the free-standing films. Compared with the LDH/PVA/BTBS film prepared by the solvent evaporation technology, the  $(\text{LDH/PVA/LDH/BTBS})_{300}$  film with the same  $W_L$  of LDH displays higher tensile stress ( $\sigma_c$ ), indicating the ordered incorporation of LDH platelets into organic matrix is beneficial to enhance the mechanical strength of the polymer. Moreover, the  $\sigma_c$  increased from ~63 MPa to ~128 MPa as  $W_L$  increased from 5.30% to 10.14%. In addition, all the  $(\text{LDH/PVA/LDH/BTBS})_{300}$  films with different  $W_L$  values exhibit good toughness (elongation at break > 10%). The results indicate the free-standing magnetic and luminescent films display excellent mechanical property, which guarantees their practical applications.
